# Supplementary material
Source: Springer Nature journal article supplement (https://www.springermedizin.de/resource/supplementary/12876_2010_521_MOESM3_ESM.pdf/9436908)
Supplement: MOESM3 [file 9436908]

# Western blotting

CD34

1 2 3 4 5 6

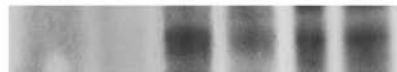

GAPDH

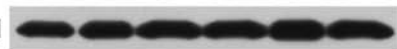

D2-40

1 2 3 4 5 6

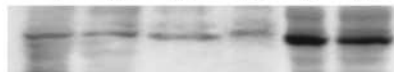

GAPDH

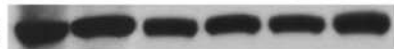

1,2: Control  
3,4: Child A-LC  
5,6: Child C-LC

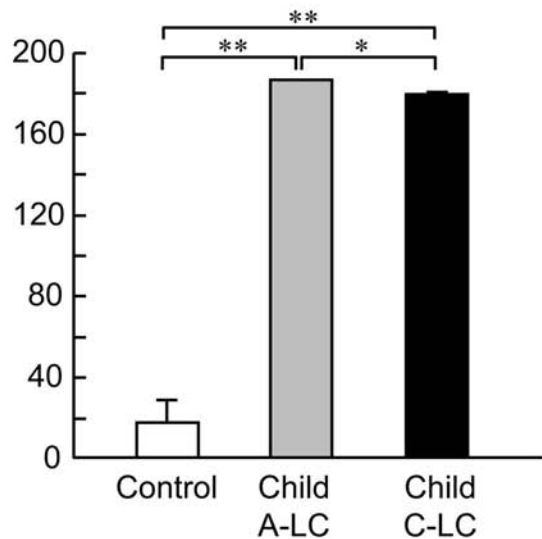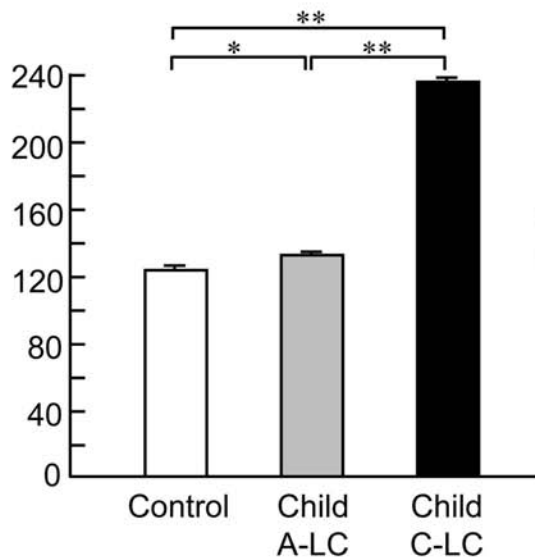

\*\* :  $p < 0.001$

\* :  $p < 0.01$

One-way Factorial ANOVA with  
Post-hoc test (Fisher's PLSD)
